# Supplementary material for: Isolation of NELL 1 Aptamers for Rhabdomyosarcoma Targeting
Source: MDPI journal article supplement (doi:10.3390/bioengineering9040174), 2022-04-15
Supplement: s1 [file s1]

# Supplementary

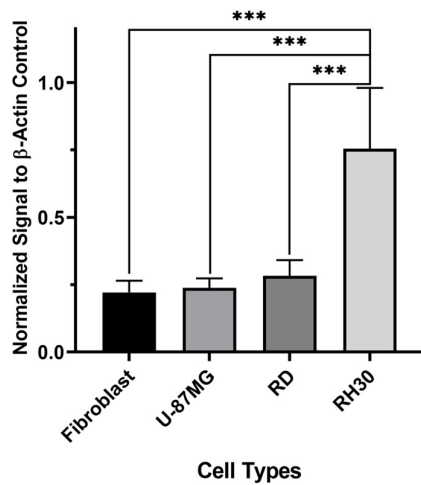

**Figure S1.** Measurement of NELL1 expression level with Western Blotting of several other cell lines.

Quantification of western blotting showing the  $\beta$ -Actin normalized NELL1 expression level of different cell lines. Data is presented at mean  $\pm$ SD for each individual cell line ( $n = 3$ ). Significance was tested using a two tailed t-test compared to the untreated cells for each cell line ( $*p \leq 0.05$ ,  $**p \leq 0.01$ ,  $***p \leq 0.005$ )

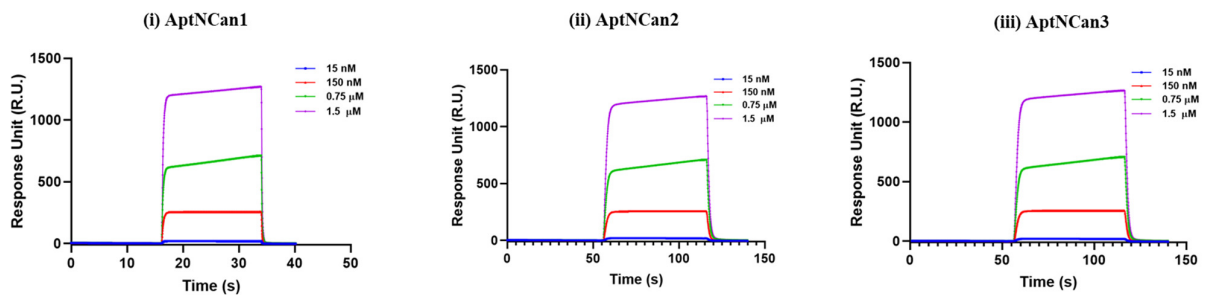

**Figure S2.** Representative quantified binding signal with different concentration of NELL-1 protein with anti-NELL1 aptamer candidates.

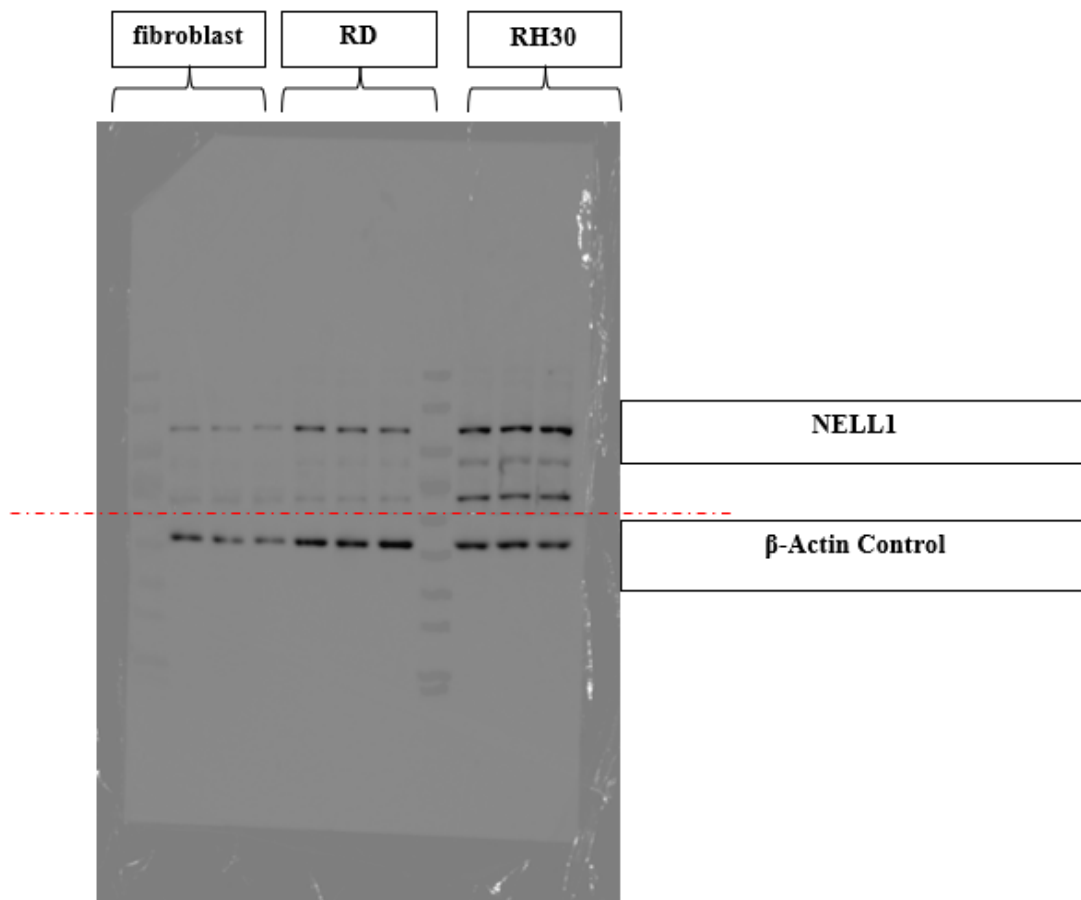

**Figure S3.** Full blot images of NELL1 expression level with Western Blotting of fibroblast, RD and RH30.

Western blotting showing NELL1 expression level of fibroblast, RD and RH30. β-Actin was applied as housekeeping gene control Red line showing the cutting position before the separate incubation for β-Actin and NELL1 with different secondary antibody.

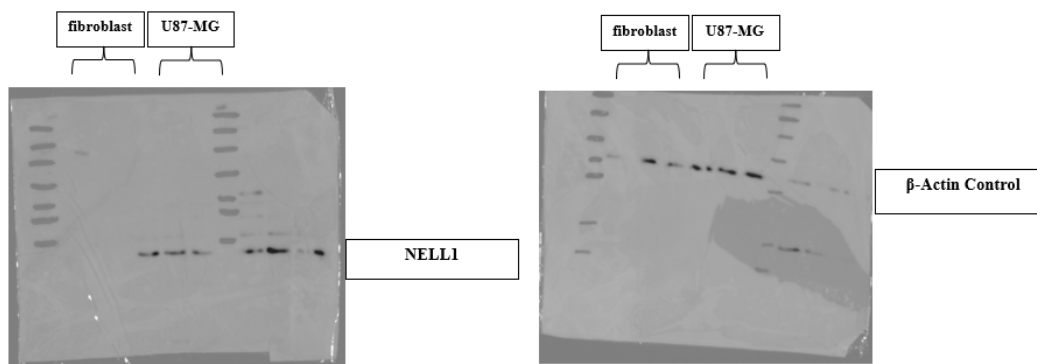

**Figure S4.** Full blot images of NELL1 expression level with Western Blotting of fibroblast, U87-MG and RH30.

Western blotting showing NELL1 expression level of fibroblast, RD and RH30.  $\beta$ -Actin was applied as housekeeping gene control The blot was cut at the last step for different incubation of secondary antibody.

**Table S1.** Measurement of densitometry readings of each  $\beta$ -Actin bands within Western Blotting of all tested cell lines.

|               | <b>Fibroblast</b> | <b>U87-MG</b> | <b>RD</b> | <b>RH30</b> |
|---------------|-------------------|---------------|-----------|-------------|
| <b>Band 1</b> | 21145.61          | 21629.48      | 33759.49  | 32272.44    |
| <b>Band 2</b> | 15774.97          | 20246.51      | 34191.32  | 32369.66    |
| <b>Band 3</b> | 14053.78          | 23285.39      | 44321.97  | 27870.78    |

**Table S2.** Measurement of densitometry readings of each NELL1 bands within Western Blotting of all tested cell lines.

|               | <b>Fibroblast</b> | <b>U87-MG</b> | <b>RD</b> | <b>RH30</b> |
|---------------|-------------------|---------------|-----------|-------------|
| <b>Band 1</b> | 2672.962          | 4205.326      | 11396.9   | 19974.44    |
| <b>Band 2</b> | 2540.79           | 3873.326      | 9929.539  | 20453.95    |
| <b>Band 3</b> | 2424.284          | 3787.912      | 9841.489  | 28318.13    |
